# Supplementary material for: The Relationship between Free Press and Under-Reporting of Non-Fatal Occupational Injuries with Data from Representative National Indicators, 2015: Focusing on the Lethality Rate of Occupational Injuries among 39 Countries
Source: MDPI journal article supplement (doi:10.3390/ijerph15122856), 2018-12-14
Supplement: s1 [file s1]

**Table S1.** The summary of regression coefficients and 95% confidence interval based on the bootstrap  
(The number of bootstrap replicates = 10,000) in 2012, 2013, and 2014.

| Variables              | Original <sup>a</sup> | Bias <sup>b</sup> | S.E. <sup>c</sup> | 95% Percentile CI | 95% BCa CI     |
|------------------------|-----------------------|-------------------|-------------------|-------------------|----------------|
| 2012 ( <i>n</i> = 42)  |                       |                   |                   |                   |                |
| Data source            | 299.2                 | 12.0              | 272.5             | (-1.4–1278.2)     | (-25.0–934.8)  |
| GDP per capita × 0.001 | -1.0                  | -1.9              | 8.9               | (-21.6–13.7)      | (-24.7–11.1)   |
| Health expenditure     | 34.9                  | 6.8               | 71.5              | (-36.9–328.6)     | (-48.0–213.7)  |
| Freedom of Press *     | 9.4                   | -0.3              | 9.6               | (1.4–61.4)        | (-4.1–33.2)    |
| Skill level 1          | 28.1                  | -1.5              | 35.0              | (-2.6–183.9)      | (-16.8–117.0)  |
| Female to male         | -1.7                  | -2.2              | 13.9              | (-70.2–7.8)       | (-42.7–10.8)   |
| Share of Industry      | -23.1                 | -1.4              | 29.5              | (-131.1–7.7)      | (-93.9–10.7)   |
| 2013 ( <i>n</i> = 43)  |                       |                   |                   |                   |                |
| Data source *          | 313.6                 | 10.0              | 221.9             | (23.4–1076.1)     | (-14.2–822.0)  |
| GDP per capita × 0.001 | -0.6                  | -1.6              | 8.5               | (-16.0–17.5)      | (-19.4–13.3)   |
| Health expenditure     | 65.5                  | 7.8               | 65.0              | (-23.3–268.3)     | (-29.2–222.0)  |
| Freedom of Press **    | 13.8                  | -0.2              | 6.3               | (6.0–40.0)        | (3.8–28.7)     |
| Skill level 1          | 5.2                   | 1.5               | 22.2              | (-29.9–70.1)      | (-26.5–60.7)   |
| Female to male         | -6.7                  | -0.9              | 14.3              | (-64.0–9.5)       | (-41.8–13.1)   |
| Share of Industry      | -13.1                 | 1.4               | 16.0              | (-62.4–9.3)       | (-47.5–13.2)   |
| 2014 ( <i>n</i> = 41)  |                       |                   |                   |                   |                |
| Data source            | 343.1                 | 7.0               | 301.8             | (-31.4–1236.9)    | (-58.7–1007.8) |
| GDP per capita × 0.001 | 1.0                   | 0.1               | 7.8               | (-7.9–26.4)       | (-12.1–19.7)   |
| Health expenditure     | 50.0                  | 4.8               | 74.4              | (-32.7–316.3)     | (-44.5–229.9)  |
| Freedom of Press *     | 8.4                   | 0.4               | 7.6               | (1.3–41.3)        | (-1.2–27.9)    |
| Skill level 1          | 47.2                  | 3.1               | 46.0              | (-2.0–222.2)      | (-7.3–160.5)   |
| Female to male         | -1.7                  | -0.3              | 15.5              | (-83.1–11.2)      | (-43.8–16.8)   |
| Share of Industry      | -2.1                  | 1.3               | 17.1              | (-73.8–15.3)      | (-41.4–25.4)   |

<sup>a</sup> indicates the regression coefficient using multiple linear regression; <sup>b</sup> indicates the difference between the mean of regression coefficient of 10,000 stored bootstrap samples and the original estimate of regression coefficient of multiple linear regression; <sup>c</sup> indicates the bootstrap estimated standard error; \* indicates that regression coefficient is statistically significant in one of methods on calculating 95% CI (percentile CI, BCa CI); \*\* indicates that regression coefficient is statistically significant in both methods on calculating 95% CI (percentile CI, BCa CI); S.E (standard error); CI (confidence interval); BCa (bias-corrected accelerated); gross domestic product (GDP).
